# Supplementary material for: Cultural and Environmental Predictors of Pre-European Deforestation on Pacific Islands
Source: PubMed Central journal article supplement (PMC4883741; doi:10.1371/journal.pone.0156340), 2016-05-27
Supplement: pone.0156340.s007.pdf [file pone.0156340.s007.pdf]

**S5 Table. Estimates of phylogenetic signal (lambda) for each of the ecological and cultural predictors, averaged across 100 replicates from the posterior distribution of language trees.**

| <b>Ecological Variables</b> | <b>Log likelihood</b> | <b>Log likelihood</b> | <b>Lambda</b> | <b>p value</b> |
|-----------------------------|-----------------------|-----------------------|---------------|----------------|
|                             | <b>without Lambda</b> | <b>with lambda</b>    |               |                |
| Abs. Latitude               | -261.841              | -209.945              | 0.998         | 0.000          |
| Age                         | -52.433               | -46.658               | 0.706         | 0.000          |
| Dust                        | -490.270              | -414.329              | 1.000         | 0.000          |
| Log(Area)                   | -120.525              | -112.034              | 0.776         | 0.000          |
| Log(Elevation)              | -51.120               | -46.372               | 0.676         | 0.001          |
| Log(Isolation)              | -74.410               | -74.206               | 0.119         | 0.509          |
| Log(Rainfall)               | -14.187               | -4.741                | 0.407         | 0.000          |
| Makatea                     | 38.328                | 42.399                | 0.584         | 0.002          |
| Tephra = 2                  | 6.104                 | 62.962                | 1.000         | 0.000          |
| Tephra = 3                  | -53.437               | 29.206                | 1.000         | 0.000          |

  

| <b>Cultural Variables</b> | <b>Log likelihood</b> | <b>Log likelihood</b> | <b>Lambda</b> | <b>p value</b> |
|---------------------------|-----------------------|-----------------------|---------------|----------------|
|                           | <b>without Lambda</b> | <b>with lambda</b>    |               |                |
| Wet                       | -54.737               | -42.479               | 0.871         | 0.000          |
| Tree                      | -42.835               | -0.319                | 1.000         | 0.000          |
| Dry                       | -53.848               | -43.248               | 0.835         | 0.000          |
| Elite                     | -49.617               | 3.031                 | 1.000         | 0.000          |
| Individual                | -45.505               | -4.985                | 1.000         | 0.000          |
