# Supplementary material for: Cultural and Environmental Predictors of Pre-European Deforestation on Pacific Islands
Source: PubMed Central journal article supplement (PMC4883741; doi:10.1371/journal.pone.0156340), 2016-05-27
Supplement: pone.0156340.s008.pdf [file pone.0156340.s008.pdf]

**S6 Table. Ecological predictors of forest replacement including cultural ancestry (lambda) but not geographic proximity (phi).**

| Predictor             | Relative variable importance | Akaike Weighted Beta estimate | 95% confidence interval |
|-----------------------|------------------------------|-------------------------------|-------------------------|
| <b>Tephra = 3</b>     | 1.000                        | -1.167                        | (-1.573, 0.207)         |
| <b>Abs. Latitude</b>  | 0.999                        | -0.034                        | (-0.048, 0.007)         |
| <b>Log(Area)</b>      | 0.975                        | -0.208                        | (-0.296, 0.045)         |
| <b>Dust</b>           | 0.898                        | -0.001                        | (-0.002, 0)             |
| <b>Tephra = 2</b>     | 0.877                        | -0.720                        | (-1.227, 0.259)         |
| <b>Log(Isolation)</b> | 0.772                        | 0.104                         | (0.029, 0.038)          |
| <b>Log(Elevation)</b> | 0.305                        | 0.094                         | (-0.118, 0.108)         |
| <b>Makatea</b>        | 0.295                        | 0.170                         | (-0.22, 0.199)          |
| <b>Age</b>            | 0.189                        | -0.032                        | (-0.136, 0.053)         |
| Log(Rainfall)         | 0.177                        | 0.041                         | (-0.065, 0.054)         |
| Dependency            | -                            | Mean                          | p-value                 |
| Lambda                | -                            | 0.991                         | <0.001                  |
| Independent           | -                            | 0.009                         | -                       |

Table shows relative variable importance, akaike weighted beta estimate and 95% confidence interval on the mean for PGLS-spatial analysis of the effects of cultural ancestry and putative ecological predictors on forest replacement (n=72). Previously identified significant predictors of deforestation are shown in bold. All values integrate over phylogenetic and sampling uncertainty across 100 replicates from our posterior distribution of language trees.
