# Supplementary material for: Cultural and Environmental Predictors of Pre-European Deforestation on Pacific Islands
Source: PubMed Central journal article supplement (PMC4883741; doi:10.1371/journal.pone.0156340), 2016-05-27
Supplement: pone.0156340.s009.pdf [file pone.0156340.s009.pdf]

**S7 Table. Model of forest replacement including only cultural ancestry (lambda) and geographic proximity (phi).**

| Dependency  | Mean | p-value |
|-------------|------|---------|
| Lambda      | 0    | 1       |
| Phi         | 1    | <0.001  |
| Independent | 0    | -       |

Table shows mean and p-values for PGLS-spatial analysis of the effects of cultural ancestry(lambda) and geographic proximity (phi) on forest replacement (n=72). All values integrate over phylogenetic and sampling uncertainty across 100 replicates from our posterior distribution of language trees.
