# Supplementary material for: Cultural and Environmental Predictors of Pre-European Deforestation on Pacific Islands
Source: PubMed Central journal article supplement (PMC4883741; doi:10.1371/journal.pone.0156340), 2016-05-27
Supplement: pone.0156340.s011.pdf [file pone.0156340.s011.pdf]

**S9 Table. Table showing results predicting deforestation and forest replacement from separate models including the intercept plus each cultural predictor, and controlling for the effects of cultural ancestry and spatial proximity.**

| Deforestation   |        |               |    |           | Forest replacement |       |               |    |           |
|-----------------|--------|---------------|----|-----------|--------------------|-------|---------------|----|-----------|
| Predictor       | Beta   | 95% C.I.      | n  | r-squared | Predictor          | Beta  | 95% C.I.      | n  | r-squared |
| Arboriculture   | -0.441 | -1.03, 0.148  | 80 | 0.027     | Arboriculture      | 0.768 | 0.515, 1.021  | 76 | 0.323     |
| Dry Intens.     | -0.032 | -0.429, 0.366 | 80 | 0.000     | Dry Intens.        | 0.043 | -0.05, 0.135  | 76 | 0.011     |
| Elite ownership | -0.079 | -0.748, 0.589 | 80 | 0.001     | Elite ownership    | 0.538 | 0.199, 0.876  | 76 | 0.116     |
| Ind. Ownership  | -0.189 | -0.623, 0.245 | 80 | 0.009     | Ind. Ownership     | 0.031 | -0.122, 0.184 | 76 | 0.002     |
| Wet intens.     | 0.461  | 0.121, 0.801  | 80 | 0.083     | Wet intens.        | 0.017 | -0.057, 0.092 | 76 | 0.002     |

Table gives beta, 95% confidence interval, n and r-squared value for each analysis. All values integrate over phylogenetic and sampling uncertainty across 100 replicates from our posterior distribution of language trees.
