# Supplementary material for: Cultural and Environmental Predictors of Pre-European Deforestation on Pacific Islands
Source: PubMed Central journal article supplement (PMC4883741; doi:10.1371/journal.pone.0156340), 2016-05-27
Supplement: pone.0156340.s013.pdf [file pone.0156340.s013.pdf]

**S11 Table. Coding schemes for forest outcomes data based on descriptions from early European visitors.**

| Score | Deforestation                                                                                                                                                        | Replacement                                                                                                                                                                                                                                                                        |
|-------|----------------------------------------------------------------------------------------------------------------------------------------------------------------------|------------------------------------------------------------------------------------------------------------------------------------------------------------------------------------------------------------------------------------------------------------------------------------|
| 1     | No deforestation                                                                                                                                                     | Introduced species comprised less than 10% of all tree individuals                                                                                                                                                                                                                 |
| 2     | Densely forested                                                                                                                                                     | Introduced species comprised 25-50% of forest tree individuals up to 600m and less than 10% above 600m                                                                                                                                                                             |
| 3     | Densely forested but with mainly introduced species in lowland in lowland secondary forests; much fire-associated grassland/ fernland on ridges, slopes and plateaus | Introduced tree species comprised 50-75% of forest tree individuals up to 600m and less than 10% above 600m, with less land above 600m than islands with a score of 2                                                                                                              |
| 4     | Largely deforested; forests mainly on coastal plain, valley floors, and very steep slopes                                                                            | As 3 but introduced tree species comprised 75-100% of forest tree individuals up to 600m                                                                                                                                                                                           |
| 5     | Almost completely deforested; fire-associated grassland/ fernland covering almost all areas not used as cropland                                                     | Original description: "There were few trees, and forest was mostly replaced by grasses and shrubs." We excluded the two sites with a score of 5 (Easter Island and Niihau Island) because it is not clear that a lack of any forest constitutes high levels of forest replacement. |
