# Supplementary material for: Cultural and Environmental Predictors of Pre-European Deforestation on Pacific Islands
Source: PubMed Central journal article supplement (PMC4883741; doi:10.1371/journal.pone.0156340), 2016-05-27
Supplement: pone.0156340.s015.pdf [file pone.0156340.s015.pdf]

**S13 Table. Table showing results predicting deforestation and forest replacement from separate models including the intercept plus each ecological predictor, and controlling for the effects of cultural ancestry and spatial proximity.**

| Deforestation  |        |                |    |           | Forest replacement |        |                |    |           |
|----------------|--------|----------------|----|-----------|--------------------|--------|----------------|----|-----------|
| Predictor      | Beta   | 95% C.I.       | n  | r-squared | Predictor          | Beta   | 95% C.I.       | n  | r-squared |
| Abs. Latitude  | 0.042  | -0.009, 0.092  | 80 | 0.033     | Abs. Latitude      | -0.03  | -0.072, 0.014  | 76 | 0.023     |
| Age            | 0.498  | 0.153, 0.844   | 76 | 0.097     | Age                | -0.016 | -0.094, 0.063  | 72 | 0.002     |
| Dust           | 0.002  | -0.001, 0.006  | 80 | 0         | Dust               | -0.001 | -0.003, 0.002  | 76 | 0.004     |
| Log(Area)      | -0.099 | -0.176, -0.022 | 80 | 0.075     | Log(Area)          | -0.034 | -0.067, -0.002 | 76 | 0.054     |
| Log(Elevation) | -0.152 | -0.311, 0.007  | 80 | 0.043     | Log(Elevation)     | -0.02  | -0.084, 0.044  | 76 | 0.005     |
| Log(Isolation) | 0.042  | -0.067, 0.15   | 80 | 0.007     | Log(Isolation)     | -0.004 | -0.038, 0.03   | 76 | 0.001     |
| Log(Rainfall)  | -0.701 | -0.914, -0.488 | 80 | 0.348     | Log(Rainfall)      | 0.007  | -0.038, 0.052  | 76 | 0.001     |
| Tephra = 2     | -0.746 | -1.567, 0.075  | 80 | 0.039     | Tephra = 2         | -0.099 | -0.608, 0.41   | 76 | 0.002     |
| Tephra = 3     | 0.081  | -0.284, 0.447  | 80 | 0         | Tephra = 3         | -0.13  | -0.734, 0.476  | 76 | 0.002     |
| % Makatea      | -0.174 | -1.119, 0.77   | 80 | 0.002     | % Makatea          | -0.624 | -0.955, -0.292 | 76 | 0.155     |

Table gives beta, 95% confidence interval, n and r-squared value for each analysis. All values integrate over phylogenetic and sampling uncertainty across 100 replicates from our posterior distribution of language trees.
